# Supplementary material
Source: PubMed Central journal article supplement (PMC7757550)
Supplement: Suppl_FigS1.pdf [file Suppl_FigS1.pdf]

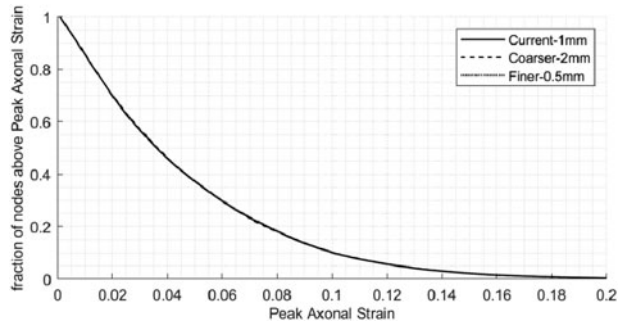

**SUPPLEMENTARY FIG. S1.** The axonal strain cumulative distribution curves extracted from the brain finite element model using fibers with 1mm (current, solid line), 2mm (coarser, dashed) and 0.5mm (finer, dotted) element sizes.
