# Supplementary material
Source: PubMed Central journal article supplement (PMC7757550)
Supplement: Suppl_FigS2.pdf [file Suppl_FigS2.pdf]

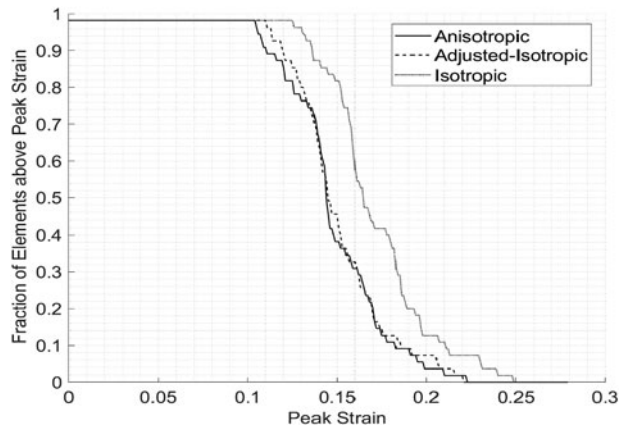

**SUPPLEMENTARY FIG. S2.** The strain cumulative distribution curves extracted from the brain finite element model using anisotropic (solid), adjusted isotropic (dashed), and isotropic (dotted) material models for brain tissue
