# Supplementary material
Source: PubMed Central journal article supplement (PMC7757550)
Supplement: Suppl_FigS3.pdf [file Suppl_FigS3.pdf]

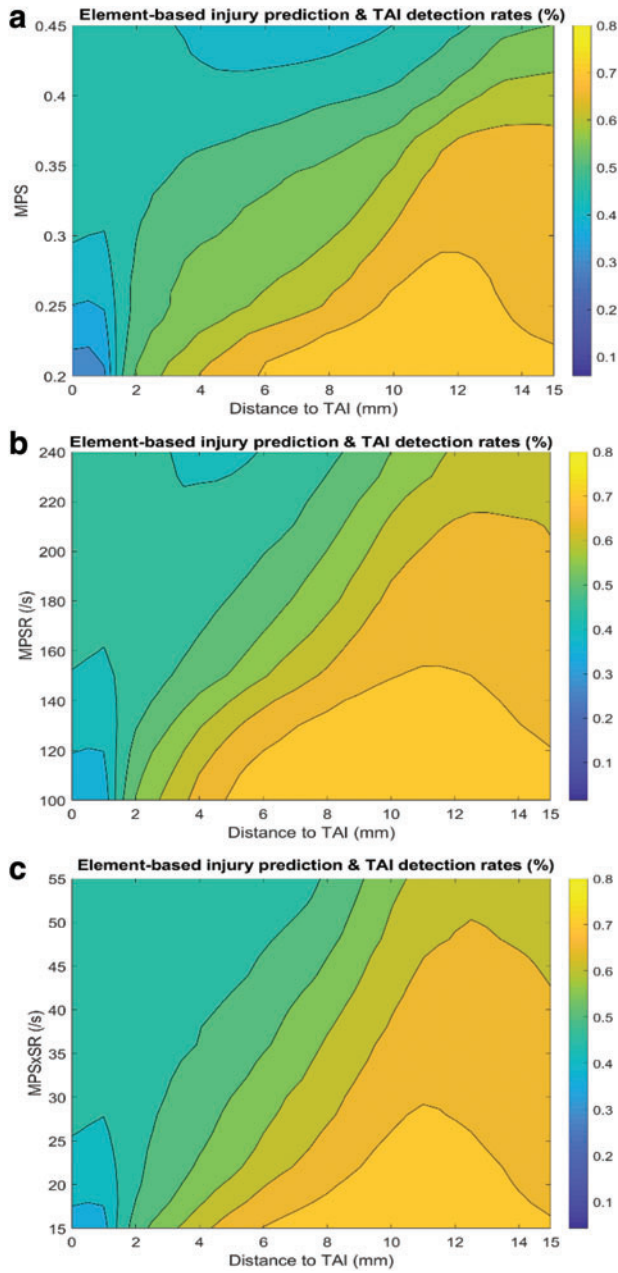

**SUPPLEMENTARY FIG. S3.** The average of the two optimization criteria, correct prediction rate and TAI detection rate, for one of the 5-fold analyses as an example, for a matrix of threshold values and  $d_s$  based on (a) MPS, (b) MPSR, and (c) MPSxSR metrics. MPS, maximum principal strain of brain tissue; MPSR, maximum principal strain rate; MPSxSR, maximum product of principal strain and strain rate; TAI, traumatic axonal injury.
