# Supplementary material
Source: PubMed Central journal article supplement (PMC7757550)
Supplement: Suppl_TableS1.pdf [file Suppl_TableS1.pdf]

SUPPLEMENTARY TABLE S1. PIG FEM MATERIAL MODELS AND PROPERTIES<sup>1</sup>

| Anatomical part                                                  | Material model                              | Material properties                                                                                                                                                                                                       | References                                                                                                                                                                                                           |
|------------------------------------------------------------------|---------------------------------------------|---------------------------------------------------------------------------------------------------------------------------------------------------------------------------------------------------------------------------|----------------------------------------------------------------------------------------------------------------------------------------------------------------------------------------------------------------------|
| Brain tissue matrix (White matter, corpus callosum, whole brain) | HGO hyperelastic & quasilinear viscoelastic | $G = 3.0478 \text{ kPa}$ $K = 2.19 \text{ GPa}$<br>$k_1 = 35.767 \text{ kPa}$ $k_2 \rightarrow 0$<br>$G_1 = 0.8909 \text{ kPa}$ $G_\infty = 0.109 \text{ kPa}$<br>$\tau_1 = 0.035 \text{ s}$ $\rho = 1.04 \text{ g/cm}^3$ | Coefficients were calibrated based on the experimental tests performed by Rashid, B., Destrade, M., Gilchrist, M.D. <sup>8</sup>                                                                                     |
| Axonal fibers                                                    | HGO Hyperelastic & quasilinear viscoelastic | $k_1 = 43.432 \text{ kPa}$<br>$k_2 \rightarrow 0$<br>$\kappa$ depending on FA values                                                                                                                                      | Properties were determined based on the volume fraction ratio and the stiffness ratio of axonal fiber bundle to the brain tissue matrix experimentally identified by Arbogast, K.B. and Margulies, S.S. <sup>9</sup> |
| Falx                                                             | Elastic                                     | $E = 15000 \text{ kPa}$ $\nu = 0.45$<br>$\rho = 1.13 \text{ g/cm}^3$                                                                                                                                                      | Sullivan, S., et al. <sup>10</sup>                                                                                                                                                                                   |
| Lateral ventricle                                                | Kelvin–Maxwell linear viscoelastic          | $G_0 = 0.5 \text{ kPa}$<br>$G_\infty = 0.1 \text{ kPa}$<br>$\tau_1 = 0.0125 \text{ s}$ $K = 2.19 \text{ GPa}$<br>$\rho = 1.04 \text{ g/cm}^3$                                                                             | Mao, H., et al. <sup>11</sup>                                                                                                                                                                                        |
| Brain-skull connector                                            | Elastic spring                              | $k = 3460 \text{ N/mm}$                                                                                                                                                                                                   | Sullivan, S., Eucker, S.A., Gabrieli, D., Bradfield, C., Coats, B., Maltese, M.R., Lee, J., Smith, C., Margulies, S.S. <sup>10</sup>                                                                                 |
